# Supplementary material
Source: HighWire-hosted journal article supplement (http://ajnr-stage2.highwire.org/highwire/filestream/52282/field_highwire_adjunct_files/0/2768_materials.pdf)
Supplement: 2768_materials.pdf [file 2768_materials.pdf]

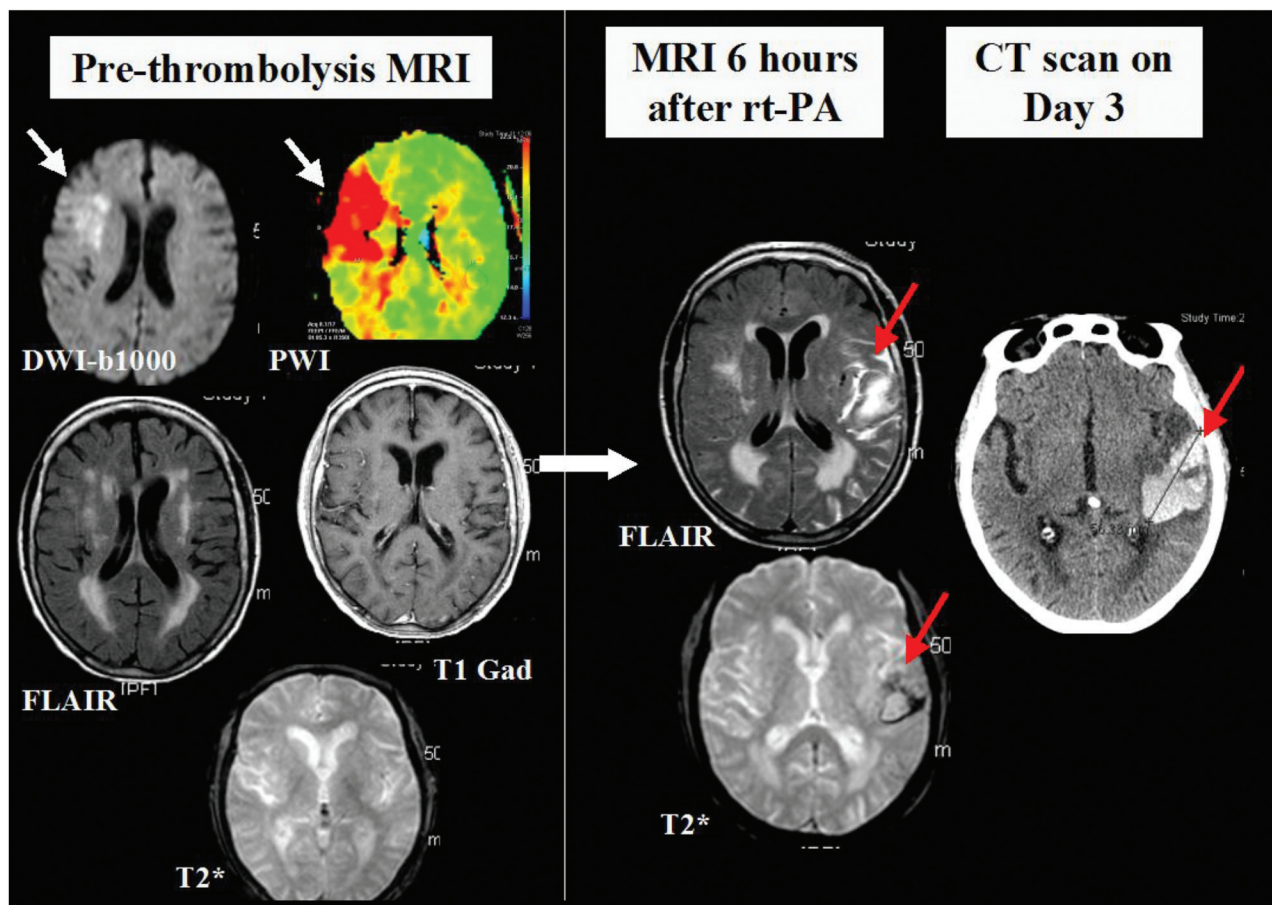

**On-Line Fig 1.** Symptomatic left hemispheric EI<sub>H</sub>, which occurred 6 hours after intravenous thrombolysis (administered 3.25 hours after the onset of symptoms) in an 84-year-old female patient without RSCI. b1000 indicates  $b=1000$ ; GAD, gadolinium.

**On-Line Table 1: Baseline patient characteristics (n = 86)<sup>a</sup>**

| Characteristic                                    | Data                       |
|---------------------------------------------------|----------------------------|
| Age, years                                        | 66 (61–78)                 |
| Male sex                                          | 49 (57)                    |
| History of hypertension                           | 50 (58)                    |
| History of hypercholesterolemia                   | 31 (36)                    |
| History of diabetes                               | 11 (13)                    |
| Tobacco use                                       | 29 (34)                    |
| Coronaryopathy                                    | 10 (13)                    |
| History of atrial fibrillation                    | 21 (25)                    |
| History of left cardiac dysfunction               | 29 (34)                    |
| History of thrombophilia                          | 4 (5)                      |
| History of stroke                                 | 14 (16)                    |
| Minor stroke or TIA in previous 3 months          | 4 (5)                      |
| Admission risk factors for HT                     |                            |
| Blood pressure >185/110 mm Hg                     | 8 (9) <sup>b</sup>         |
| Glycemia >11 mmol/L                               | 6 (7)                      |
| Platelets <100 × 10 <sup>3</sup> /mm <sup>3</sup> | 3 (3)                      |
| Stroke etiology (TOAST) <sup>c</sup>              |                            |
| Large-vessel disease                              | 8 (9)                      |
| Small-vessel disease                              | 0                          |
| Cardioembolic                                     | 43 (50)                    |
| Other                                             | 12 (14) <sup>d</sup>       |
| Undetermined                                      | 23 (27)                    |
| Acute stroke                                      |                            |
| NIHSS score on admission                          | 15 (9–19)                  |
| Time from onset to treatment (hr)                 | 3.1 (2.8–4.5) <sup>e</sup> |
| Intravenous rtPA                                  | 57 (66)                    |
| Intra-arterial rtPA                               | 29 (34)                    |
| Anterior circulation territory                    | 72 (84)                    |
| Vessel occlusion on MRA                           | 70 (81)                    |
| Carotid or basilar artery occlusion               | 27 (31)                    |

<sup>a</sup> Median (IQR) or No. (%)<sup>b</sup> Data were not available in 1 patient.<sup>c</sup> Patients younger than 56 years with associated patent foramen ovale and atrial septum aneurysm were classified under “cardioembolic.”<sup>d</sup> “Other” etiology was set as thrombophilia in 2 patients, arterial dissection in 5, large-vessel atherosclerosis without stenosis in 3, and aortic arch atherosclerosis (>4 mm) in 2 patients.<sup>e</sup> Data were not recorded in 6 patients.

**On-line Table 2: Comparative baseline patient characteristics**

| Median (IQR) or No. (%)                           | Group without RSCI<br>(n = 76) | Group with RSCI<br>(n = 10) | p <sup>a</sup> |
|---------------------------------------------------|--------------------------------|-----------------------------|----------------|
| Age (yr)                                          | 67 (61.5–79)                   | 63 (42–74)                  | .08            |
| Male sex                                          | 43 (57)                        | 6 (60)                      | 1.00           |
| History of hypertension                           | 47 (62)                        | 3 (30)                      | .09            |
| History of hypercholesterolemia                   | 29 (38)                        | 2 (20)                      | .32            |
| History of diabetes                               | 8 (11)                         | 3 (30)                      | .11            |
| Tobacco use                                       | 24 (32)                        | 5 (50)                      | .29            |
| Coronaryopathy                                    | 9 (12)                         | 1 (10)                      | 1.00           |
| History of atrial fibrillation                    | 21 (28)                        | 0                           | .06            |
| History of left cardiac dysfunction               | 11 (15)                        | 0                           | .35            |
| History of thrombophilia                          | 2 (3)                          | 2 (20)                      | .06            |
| History of stroke                                 | 13 (17)                        | 1 (10)                      | 1.00           |
| Minor IS or TIA in previous 3 months              | 3 (4)                          | 1 (10)                      | .40            |
| Admission risk factors for HT                     |                                |                             |                |
| Blood pressure >185/110 mm Hg                     | 7 (9) <sup>b</sup>             | 1 (10)                      | 1.00           |
| Glycemia >11 mmol/L                               | 4 (5)                          | 2 (20)                      | .14            |
| Platelets <100 × 10 <sup>3</sup> /mm <sup>3</sup> | 3 (4)                          | 0                           | 1.00           |
| Stroke etiology (TOAST) <sup>c</sup>              |                                |                             | <.001          |
| Large-vessel disease                              | 4 (5)                          | 4 (40)                      |                |
| Small-vessel disease                              | 0                              | 0                           |                |
| Cardioembolic                                     | 42 (55)                        | 1 (10)                      |                |
| Other                                             | 9 (12)                         | 3 (30) <sup>d</sup>         |                |
| Undetermined                                      | 21 (28)                        | 2 (20)                      |                |
| Acute stroke                                      |                                |                             |                |
| NIHSS score on admission                          | 15 (9–19)                      | 14 (11–18)                  | .85            |
| Time from onset to treatment (hr)                 | 3.3 (2.8–4.5) <sup>e</sup>     | 3 (2.6–4)                   | .44            |
| Intravenous rtPA                                  | 52 (68)                        | 5 (50)                      | .29            |
| Anterior circulation territory                    | 64 (84)                        | 8 (80)                      | .66            |
| Vessel occlusion on MRA                           | 60 (79)                        | 10 (100)                    | .20            |
| Carotid or basilar artery occlusion               | 21 (28)                        | 6 (60)                      | .06            |

<sup>a</sup> Univariate comparison using the 2-sided Fisher exact test or Wilcoxon-Mann-Whitney test where applicable.

<sup>b</sup> Data unavailable for 1 patient.

<sup>c</sup> Patients younger than 56 years with associated patent foramen ovale and atrial septum aneurysm were classified under “cardioembolic.”

<sup>d</sup> Etiology was set as thrombophilia for 2 patients and arterial dissection in 1.

<sup>e</sup> Data were not recorded for 6 patients.
